# Supplementary material for: Triphenothiazinyl triazacoronenes: donor–acceptor molecular graphene exhibiting multiple fluorescence and electrogenerated chemiluminescence emissions
Source: Royal Society of Chemistry journal article supplement (doi:10.1039/c7tc00314e), 2017-01-01
Supplement: c7tc00314e1.pdf [file c7tc00314e1.pdf]

Electronic Supplementary Material (ESI) for Journal of Materials Chemistry C.

This journal is © The Royal Society of Chemistry 2017

## **Triphenothiazinyl triazacoronenes: Donor–acceptor molecular graphene exhibiting multiple fluorescence and electrogenerated chemiluminescence emissions**

Ying Zhao,<sup>a</sup> Qiang Zhang,<sup>a</sup> Ke Chen,<sup>a</sup> Hongfang Gao,<sup>a</sup> Honglan Qi,<sup>†a</sup> Xianying Shi,<sup>a</sup> Yajun Han,<sup>a</sup> Junfa Wei,<sup>†a</sup> Chengxiao Zhang<sup>†a</sup>

*Key Laboratory of Applied Surface and Colloid Chemistry (Ministry of Education), School of Chemistry and Chemical Engineering, Shaanxi Normal University, Xi'an, 710062, P.R. China.*

*† Corresponding Authors: [cxzhang@snnu.edu.cn](mailto:cxzhang@snnu.edu.cn); [weijf@snnu.edu.cn](mailto:weijf@snnu.edu.cn); [honglanqi@snnu.edu.cn](mailto:honglanqi@snnu.edu.cn).*

## Table of Contents

|                   |                                                                                     |            |
|-------------------|-------------------------------------------------------------------------------------|------------|
| <b>Figure S1</b>  | <sup>1</sup> H NMR spectrum of TPTZ-TAC1 recorded in CDCl <sub>3</sub>              | <b>S3</b>  |
| <b>Figure S2</b>  | <sup>13</sup> C NMR spectrum of TPTZ-TAC1 recorded in CDCl <sub>3</sub>             | <b>S3</b>  |
| <b>Figure S3</b>  | HRMS (ESI) spectrum of TPTZ-TAC1 recorded in THF/CH <sub>3</sub> CN                 | <b>S4</b>  |
| <b>Figure S4</b>  | Photo of PTZ, TAC and TPTZ-TAC1                                                     | <b>S4</b>  |
| <b>Figure S5</b>  | Photo of different concentrations of TPTZ-TAC1                                      | <b>S5</b>  |
| <b>Figure S6</b>  | Absorption spectra of TPTZ-TAC1 at different concentrations                         | <b>S5</b>  |
| <b>Figure S7</b>  | Normalized absorption spectra for TPTZ-TAC1 in different solvents                   | <b>S6</b>  |
| <b>Figure S8</b>  | Normalized fluorescence spectra for TPTZ-TAC1 in different solvents                 | <b>S6</b>  |
| <b>Figure S9</b>  | Normalized absorption and fluorescence spectra for TPTZ-TACs                        | <b>S7</b>  |
| <b>Figure S10</b> | Normalized fluorescence spectra for different concentrations of TPTZ-TACs           | <b>S8</b>  |
| <b>Figure S11</b> | Cyclic voltammograms of TPTZ-TAC1                                                   | <b>S9</b>  |
| <b>Figure S12</b> | Cyclic voltammograms of TPTZ-TAC1 with different scan rates                         | <b>S10</b> |
| <b>Figure S13</b> | Cyclic voltammogram of TPTZ-TAC1 at platinum UME                                    | <b>S11</b> |
| <b>Figure S14</b> | Plot of the experimental ratio $i_t/i_{ss}$ against the inverse square root of time | <b>S11</b> |
| <b>Figure S15</b> | Comparison between simulated and experimental oxidation waves for TPTC-TAC1         | <b>S12</b> |
| <b>Figure S16</b> | Comparison between simulated and experimental reduction waves for TPTC-TAC1         | <b>S13</b> |
| <b>Figure S17</b> | Cyclic voltammograms of TPTZ-TAC2 and TPTZ-TAC3                                     | <b>S14</b> |
| <b>Figure S18</b> | Comparison between simulated and experimental reduction waves for TPTZ-TAC2         | <b>S15</b> |
| <b>Figure S19</b> | Comparison between simulated and experimental reduction waves for TPTZ-TAC3         | <b>S16</b> |
| <b>Figure S20</b> | Comparison between simulated and experimental oxidation waves for TPTZ-TAC2         | <b>S17</b> |
| <b>Figure S21</b> | Comparison between simulated and experimental oxidation waves for TPTZ-TAC3         | <b>S18</b> |
| <b>Figure S22</b> | ECL and CV simultaneous measurements for TPTZ-TAC1                                  | <b>S19</b> |
| <b>Figure S23</b> | Normalized fluorescence and ECL spectra of TPTZ-TAC1                                | <b>S20</b> |
| <b>Figure S24</b> | Normalized fluorescence and ECL spectra of TPTZ-TAC2                                | <b>S20</b> |
| <b>Figure S25</b> | Normalized fluorescence and ECL spectra of TPTZ-TAC3                                | <b>S21</b> |

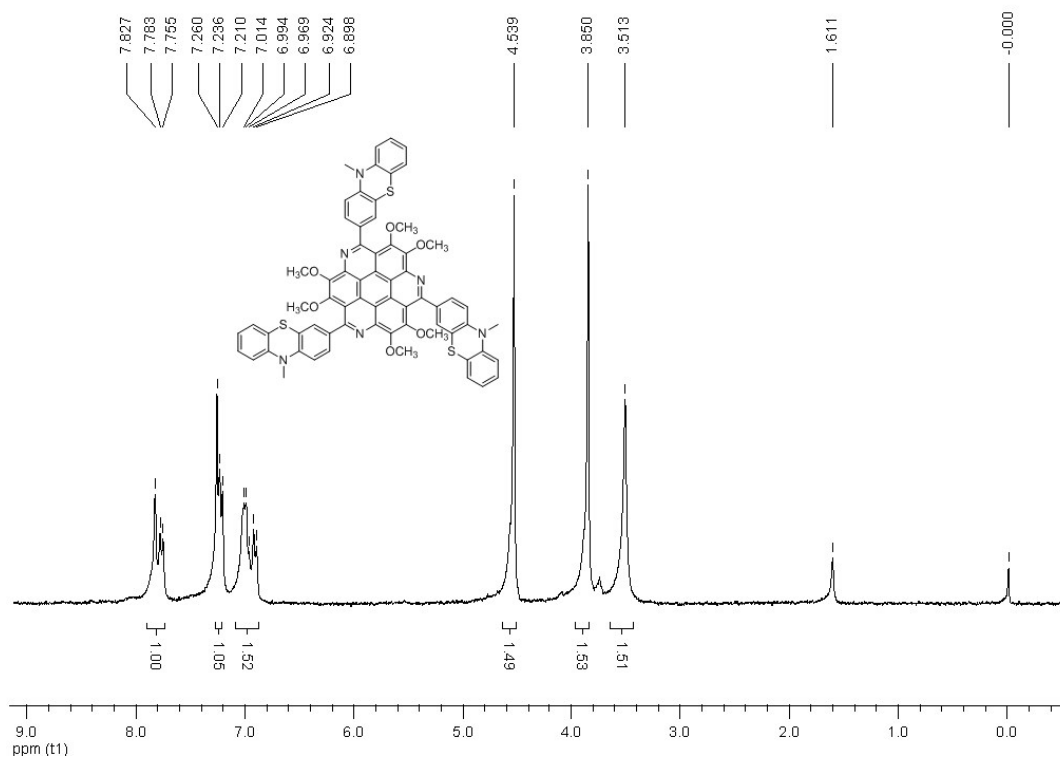

Figure S-1. <sup>1</sup>H NMR spectrum of TPTZ-TAC1 recorded in CDCl<sub>3</sub>

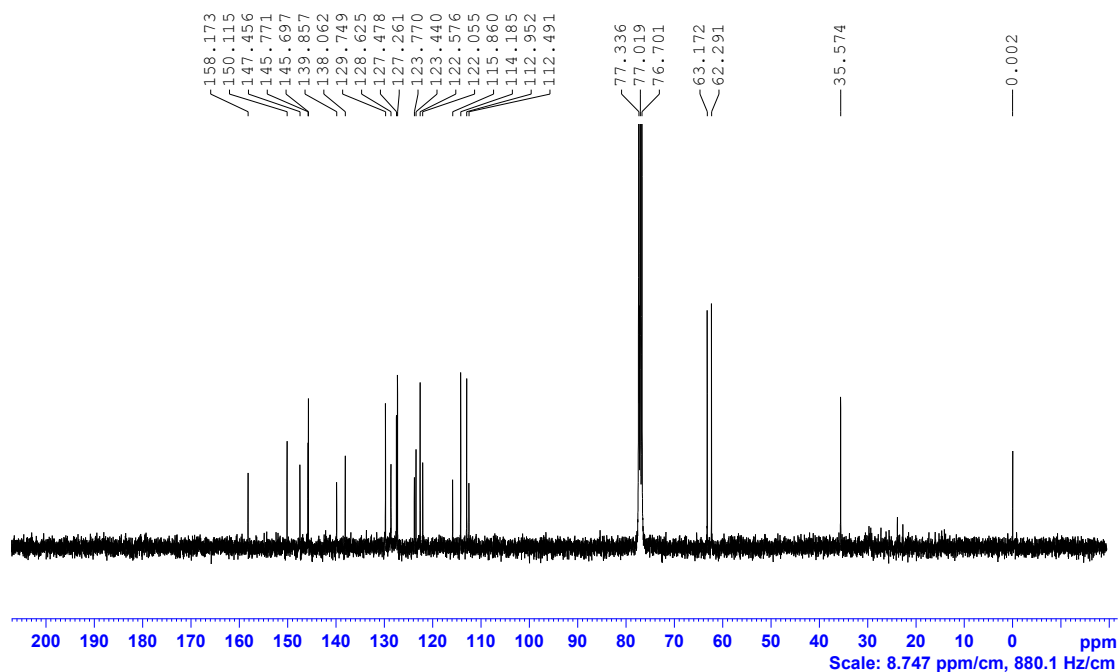

Figure S-2. <sup>13</sup>C NMR spectrum of TPTZ-TAC1 recorded in CDCl<sub>3</sub>

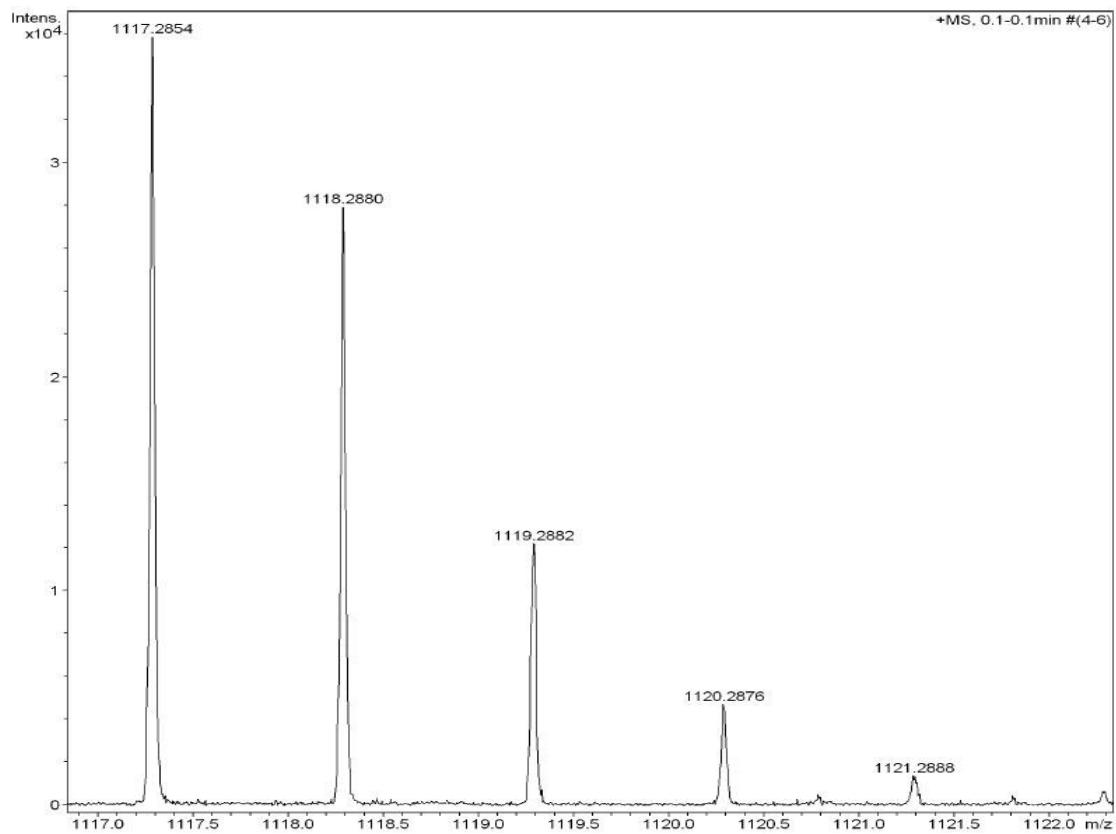

**Figure S-3.** HRMS (ESI) spectrum of TPTZ-TAC1 recorded in THF/CH<sub>3</sub>CN.

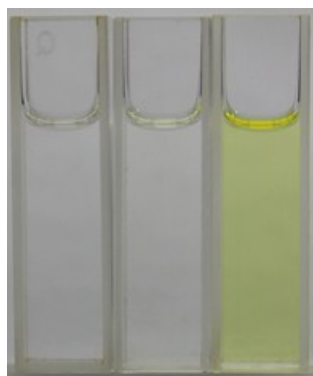

**Figure S-4.** Photo of  $1 \times 10^{-5}$  M PTZ, TAC and TPTZ-TAC1 in benzene: MeCN ( $v:v=1:1$ ) from left to right.

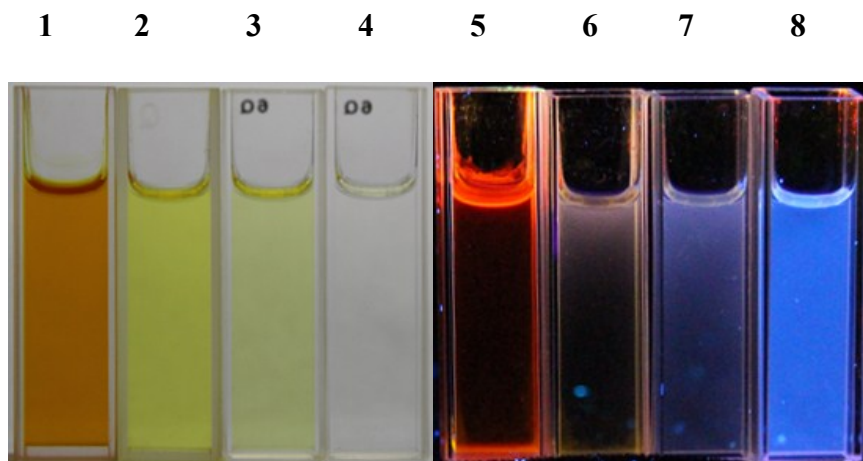

**Figure S-5.** Photo of  $1 \times 10^{-3}$  M,  $2 \times 10^{-5}$  M,  $1 \times 10^{-5}$  M,  $5 \times 10^{-7}$  M TPTZ-TAC1 in benzene: MeCN ( $v:v=1:1$ ) from left to right. 1-4 in bright light, 5-8 excited in 365 nm UV lamp in dark condition.

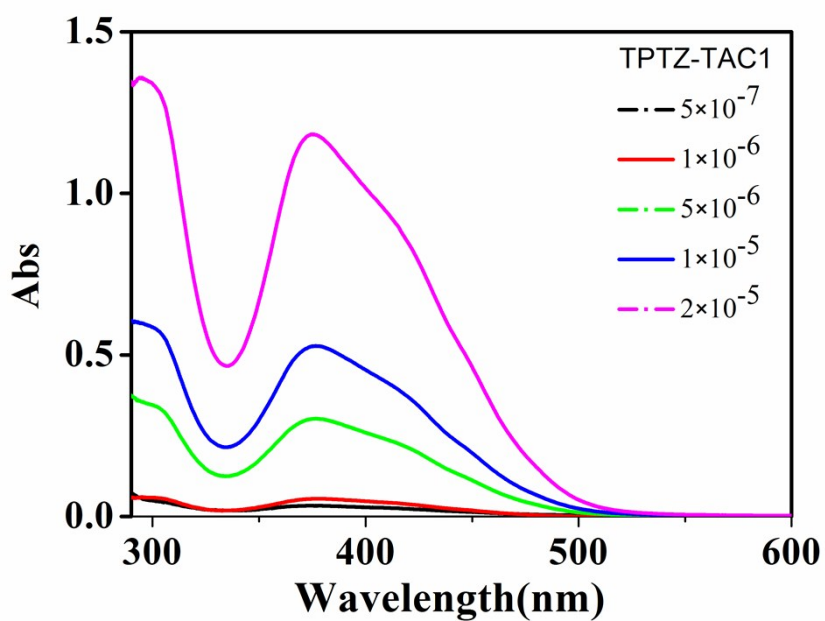

**Figure S-6.** Absorption spectra of TPTZ-TAC1 at different concentrations in benzene: MeCN ( $v:v=1:1$ ).

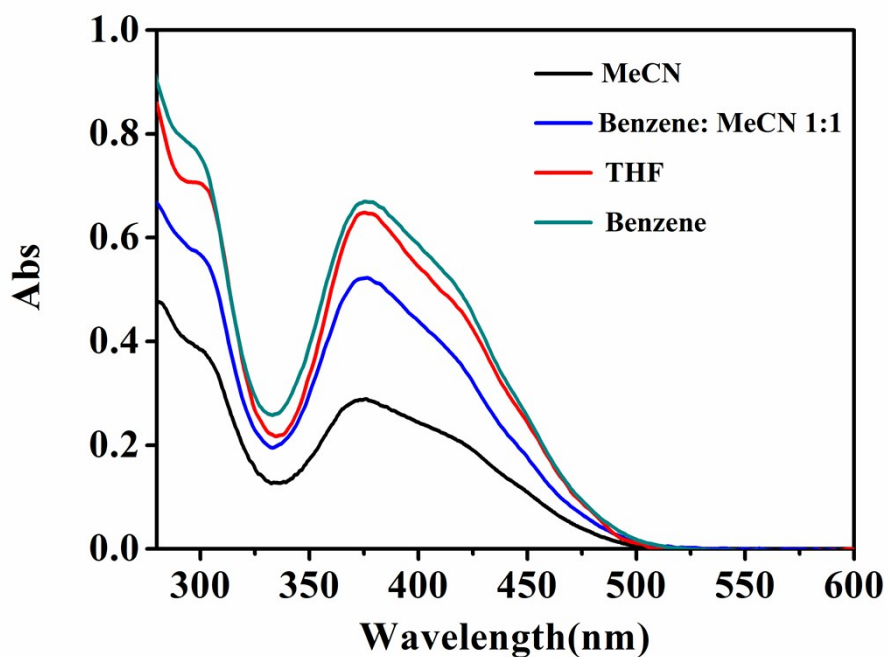

Figure S-7. Absorption spectra of 10  $\mu\text{M}$  TPTZ-TAC1 in different solvents.

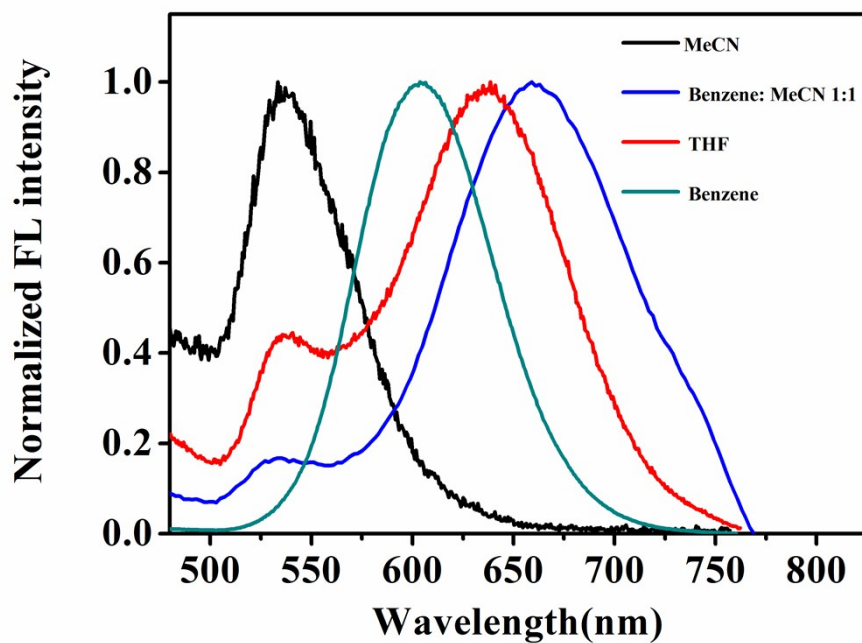

Figure S-8. Normalized fluorescence spectra for 20  $\mu\text{M}$  TPTZ-TAC1 in different solvents.

Fluorescence emissions were excited at the absorption maximum wavelength.

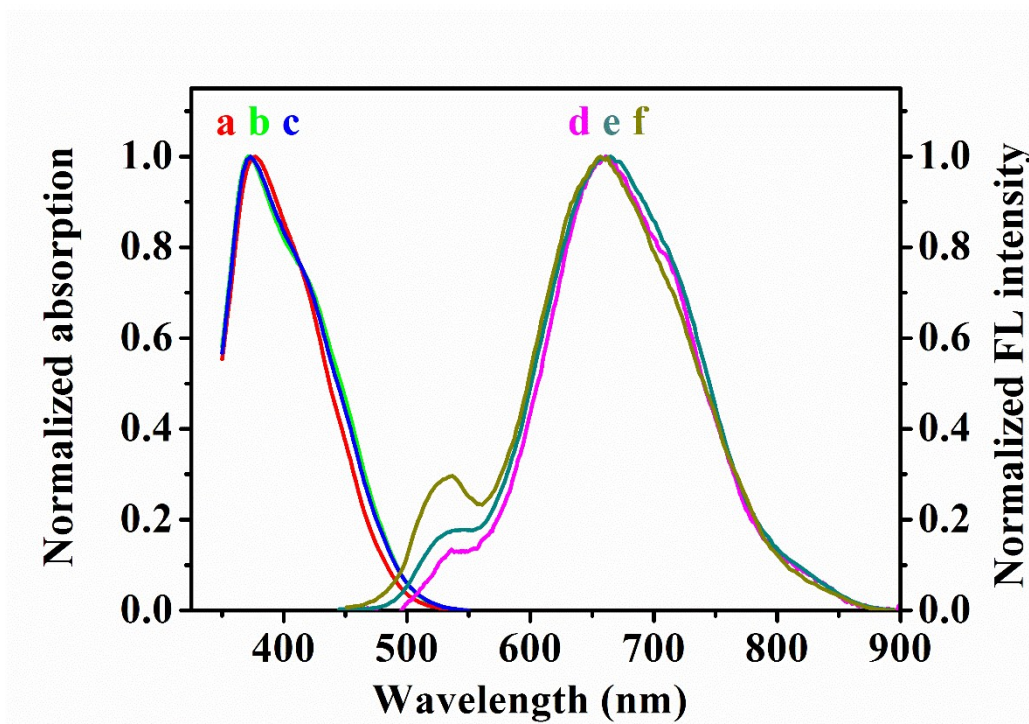

**Figure S-9.** Normalized absorption (a, b, c) and fluorescence spectra (d, e, f) for 10  $\mu\text{M}$  TPTZ-TAC1 (a, d), 10  $\mu\text{M}$  TPTZ-TAC2 (b, e) and 10  $\mu\text{M}$  TPTZ-TAC3 (c, f) in benzene: MeCN ( $v:v=1:1$ ). Fluorescence emissions were excited at the absorption maximum wavelength.

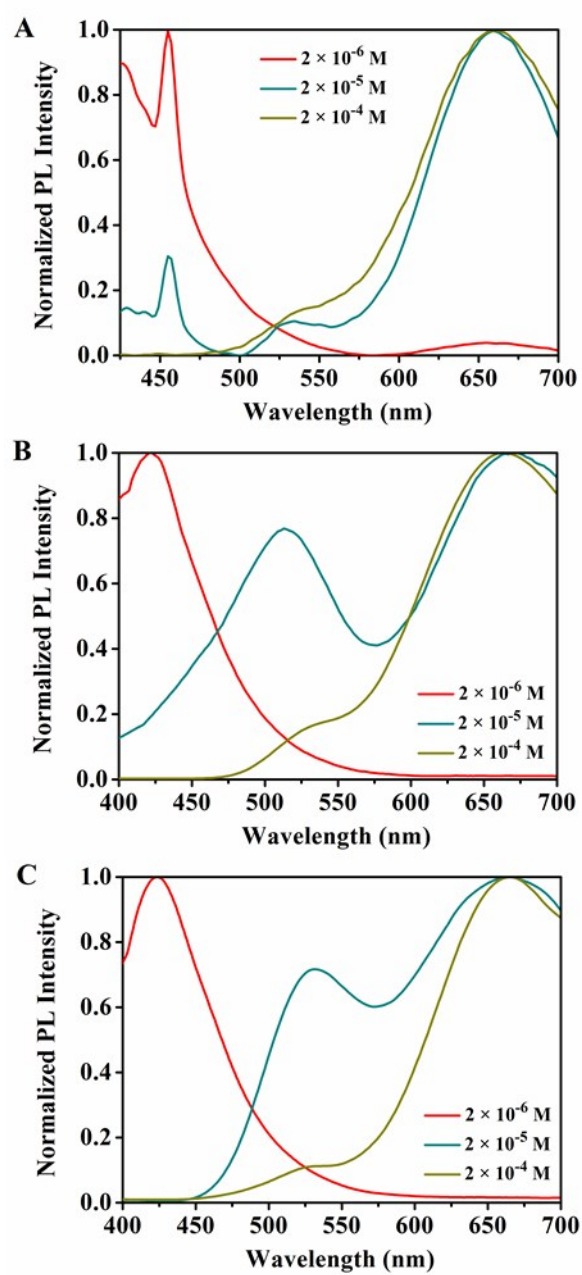

**Figure S-10.** Normalized fluorescence spectra for different concentrations of TPTZ-TAC1 (A), TPTZ-TAC2 (B) and TPTZ-TAC3 (C) in benzene: MeCN ( $v:v=1:1$ ). Fluorescence emissions were excited at the absorption maximum wavelength.



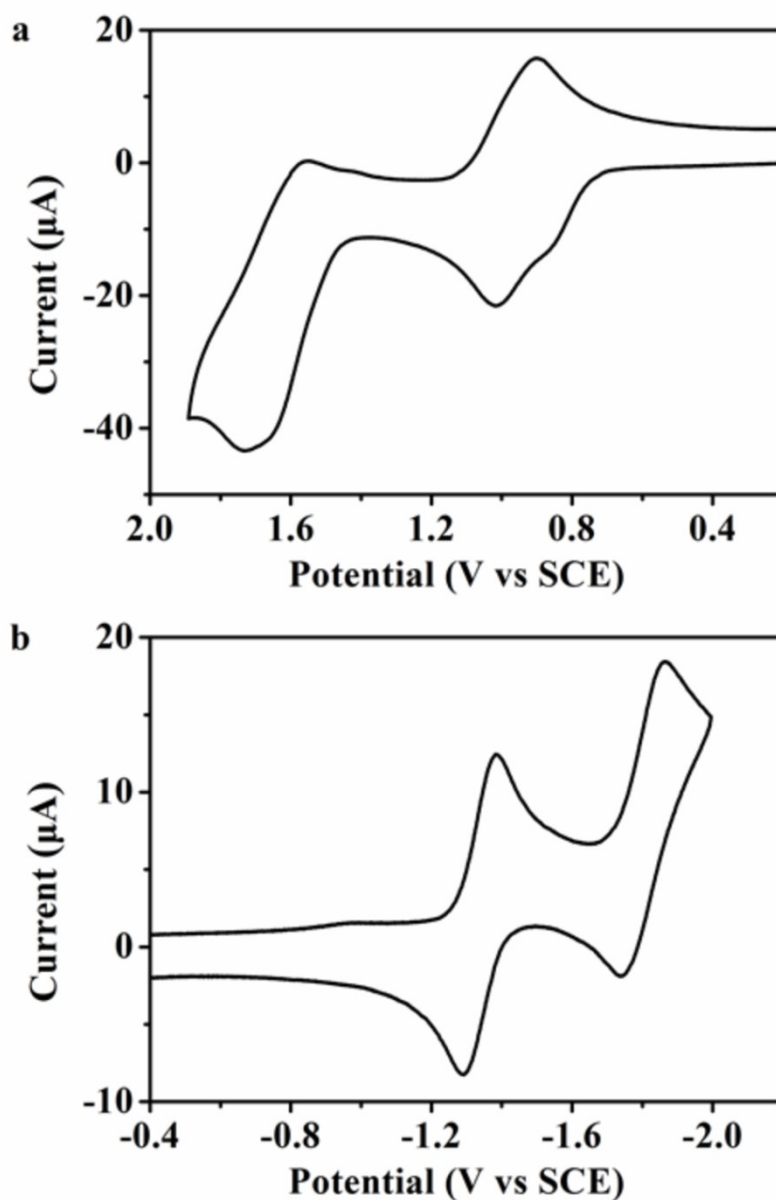

**Figure S-11.** Cyclic voltammograms of 1.5 mM TPTZ-TAC1 in benzene: MeCN (v:v=1:1) containing 0.1 M TBAPF<sub>6</sub> with a scan rate of 0.5 V/s at a Pt electrode (electrode area is 0.027cm<sup>2</sup>).

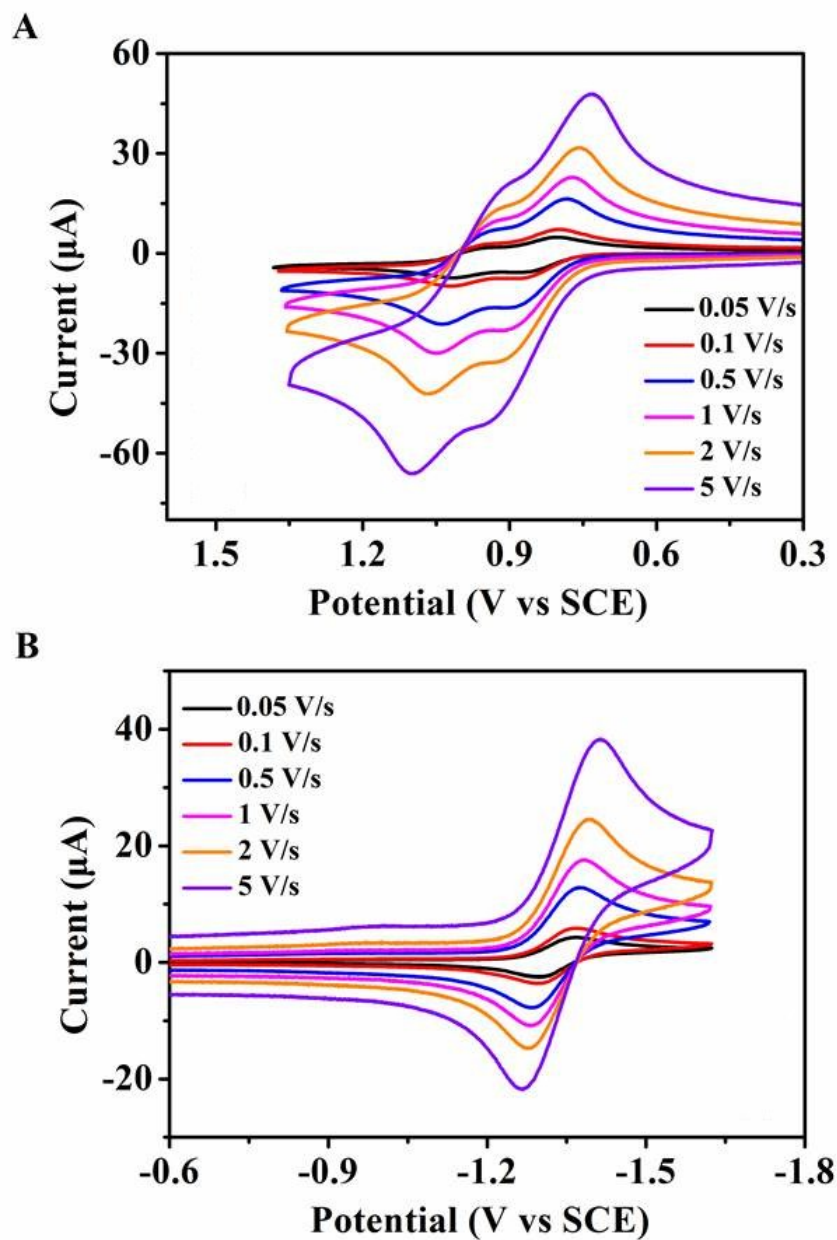

**Figure S-12.** Cyclic voltammograms of 1.5 mM TPTZ-TAC1 in benzene: MeCN ( $v:v=1:1$ ) containing 0.1 M TBAPF<sub>6</sub> at a Pt electrode (electrode area is 0.027cm<sup>2</sup>) with different scan rates.

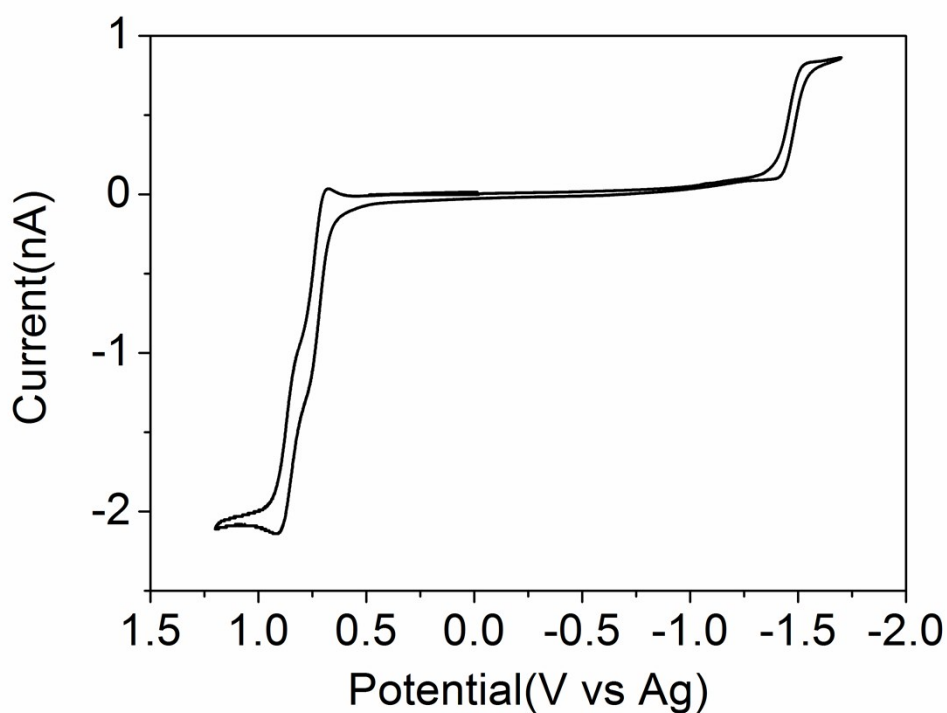

**Figure S-13.** Cyclic voltammogram of 1.5 mM TPTZ-TAC1 in benzene: MeCN ( $v:v=1:1$ ) containing 0.1M TBAPF<sub>6</sub> at platinum UME ( $r = 11 \mu\text{m}$ ) with a scan rate of 10 mV/s.

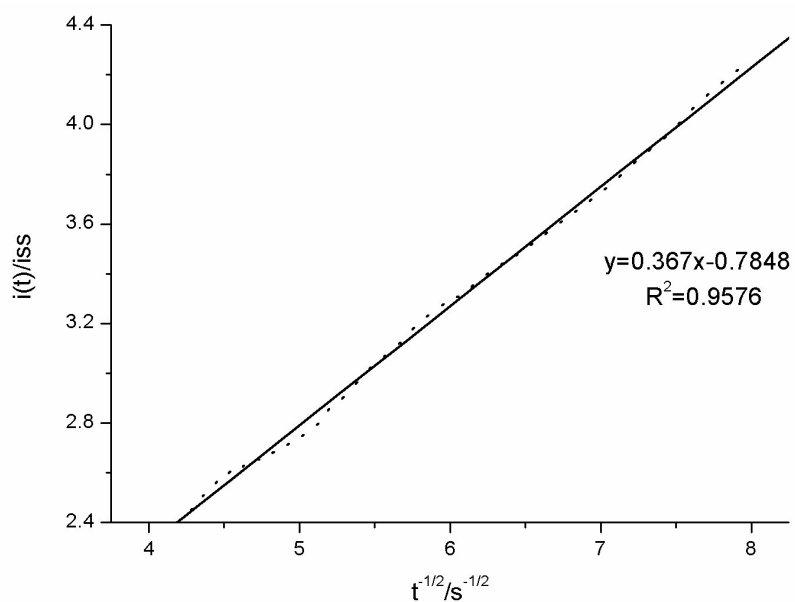

**Figure S-14.** Plot of the experimental ratio  $i(t)/i_{ss}$  against the inverse square root of time (s). The data were obtained in benzene: MeCN ( $v:v=1:1$ ) containing 1.5 mM PTZ-TAC1 and 0.1 M TBAPF<sub>6</sub> at an platinum UME ( $r = 11 \mu\text{m}$ ), and oxidation at  $E = +1.1 \text{ V vs Ag}$ .

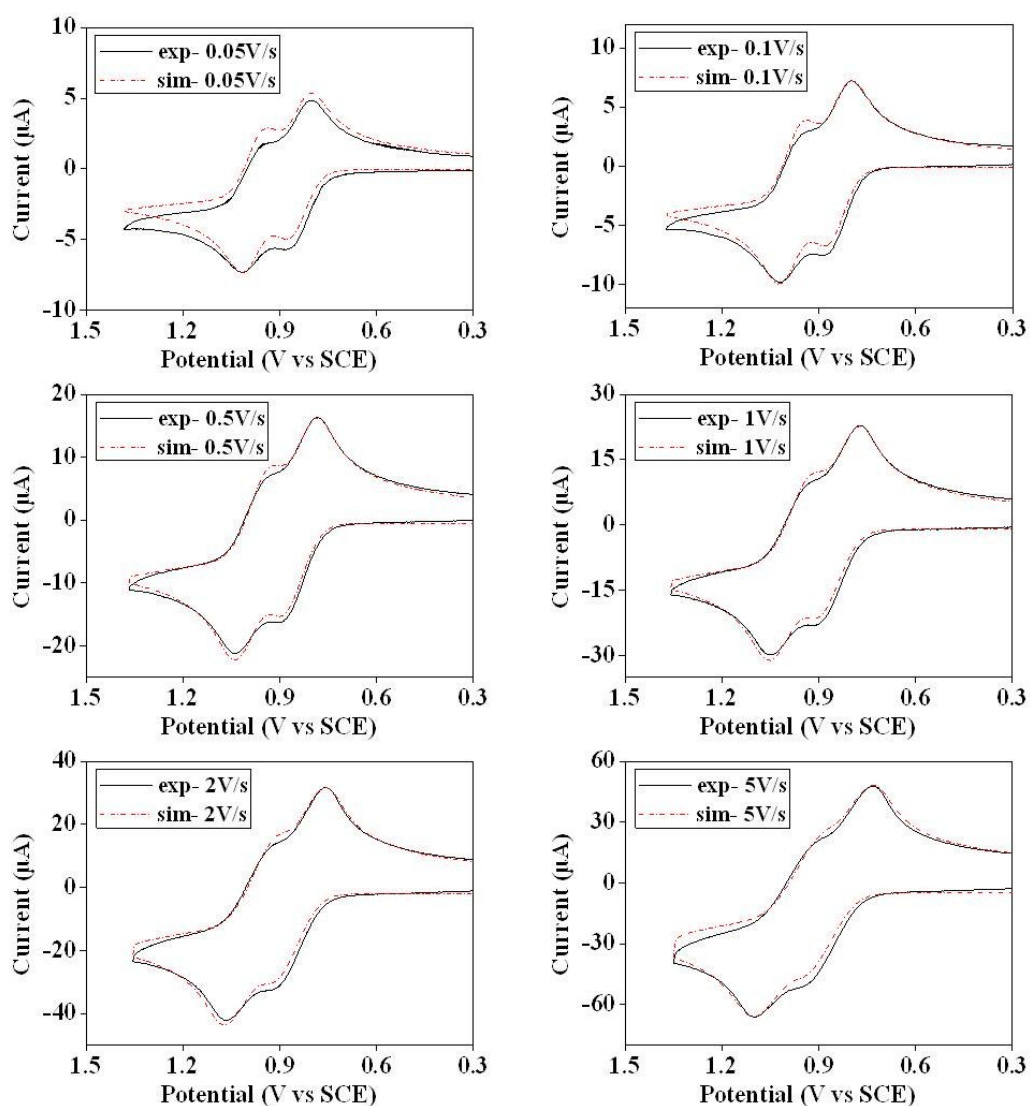

**Figure S-15.** Comparison between simulated and experimental oxidation waves for 1.5 mM TPTZ-TAC1 at different scan rates. The model for these oxidation simulations: ECE, with  $n = 2$ , with a heterogeneous rate constant,  $\alpha = 0.5$ ,  $k_1^0 = 0.05$  cm/s,  $k_2^0 = 0.04$  cm/s. Simulated data:  $E_1^0 = 0.84$  V vs SCE,  $E_2^0 = 0.96$  V vs SCE; Diffusion coefficient:  $7.05 \times 10^{-6}$  cm<sup>2</sup>/s, uncompensated resistance 666  $\Omega$ , capacitance  $1 \times 10^{-6}$  F. Experimental conditions: solvent: benzene: MeCN ( $v:v=1:1$ ), supporting electrolyte: 0.1 M TBAPF<sub>6</sub>, Pt electrode area 0.027 cm<sup>2</sup>.

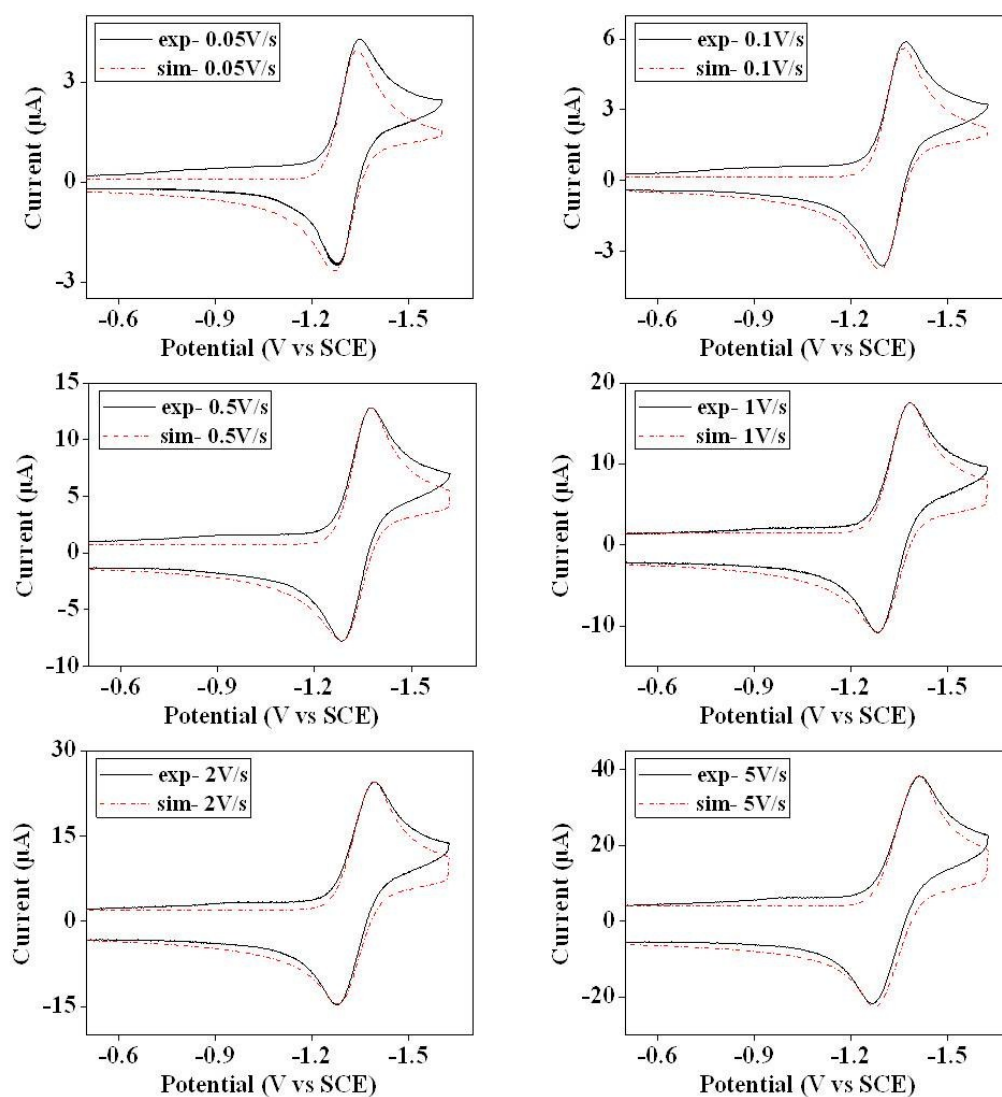

**Figure S-16.** Comparison between simulated and experimental reduction waves for 1.5 mM TPTZ-TAC1 at different scan rates. The model for these reduction simulations: EC, with  $n = 1$ , with a heterogeneous rate constant,  $\alpha = 0.5$ ,  $k^0 = 1 \times 10^4$  cm/s and a homogeneous forward rate constant,  $k_{\text{eq}} = 0.5$ ,  $k_f = 8$  s $^{-1}$ . Simulated data:  $E^\circ = -1.34$  V vs SCE; Diffusion coefficient:  $7.05 \times 10^{-6}$  cm $^2$ /s, uncompensated resistance 883  $\Omega$ , capacitance  $1.5 \times 10^{-6}$  F. Experimental conditions: solvent: benzene: MeCN ( $v:v=1:1$ ), supporting electrolyte: 0.1 M TBAPF $_6$ , Pt electrode area 0.027 cm $^2$ .

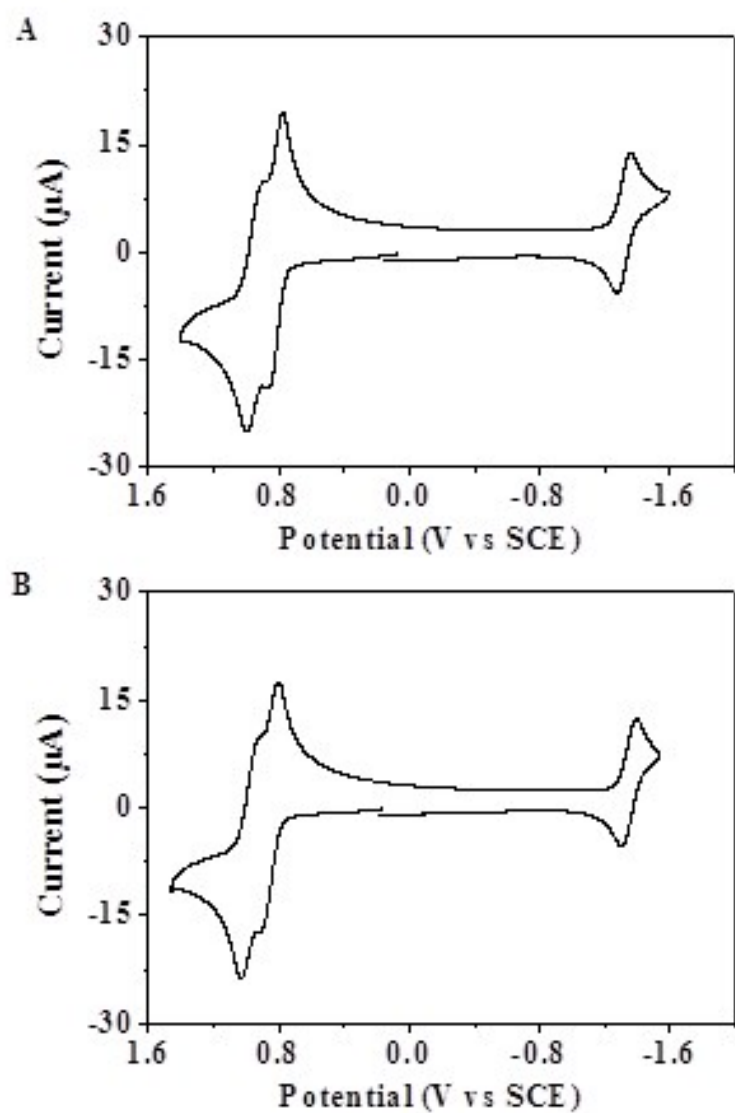

**Figure S-17.** Cyclic voltammograms of 1.5 mM TPTZ-TAC2 (A) and 1.5 mM TPTZ-TAC3 (B) in benzene: MeCN ( $v:v=1:1$ ) containing 0.1 M TBAPF<sub>6</sub> at platinum electrode with scan rate of 0.5 V/s (electrode area is 0.027 cm<sup>2</sup>).

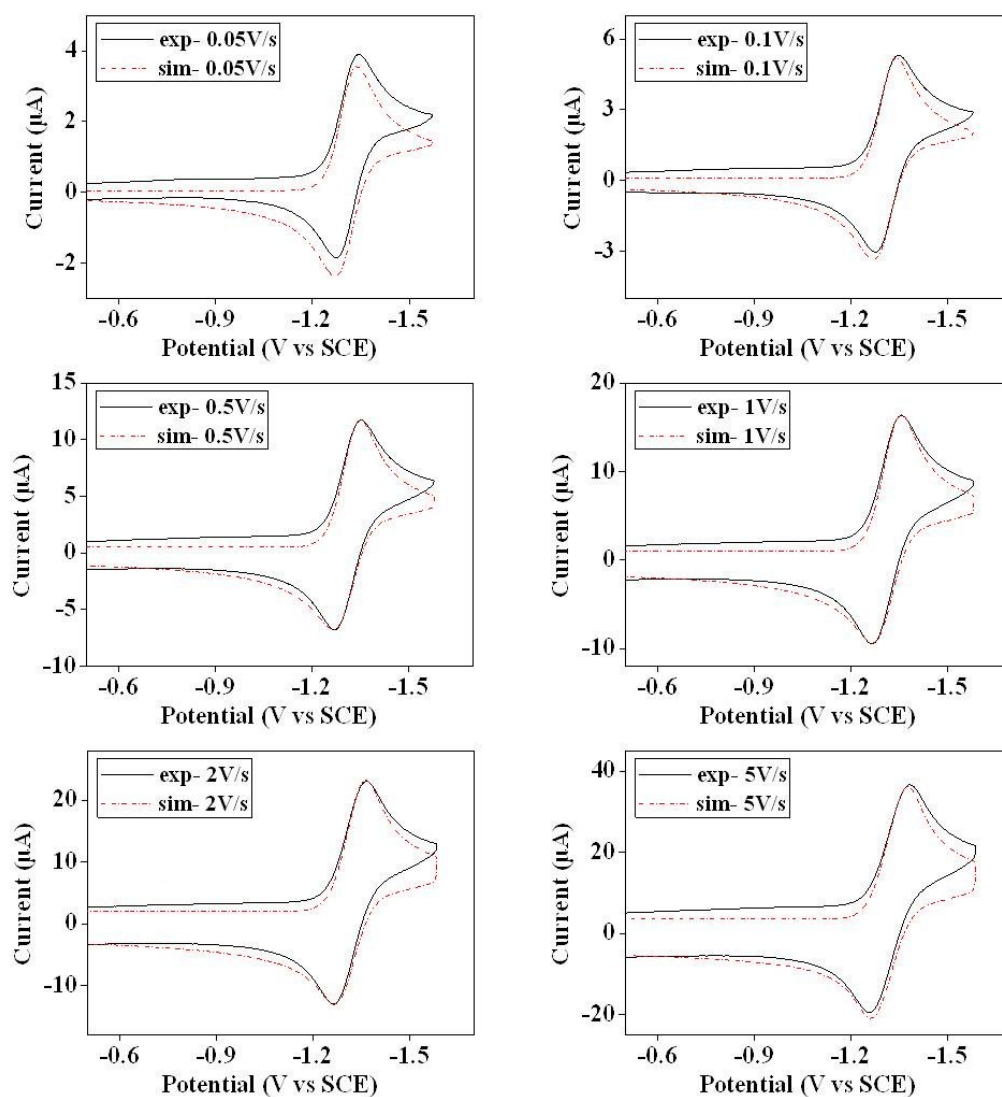

**Figure S-18.** Comparison between simulated and experimental reduction waves for 1.5 mM TPTZ-TAC2 at different scan rates. The model for these reduction simulations: EC, with  $n = 1$ , with a heterogeneous rate constant,  $\alpha = 0.5$ ,  $k^0 = 1 \times 10^4$  cm/s and a homogeneous forward rate constant,  $k_{\text{eq}} = 0.6$ ,  $k_f = 8 \text{ s}^{-1}$ . Simulated data:  $E^\circ = -1.32$  V vs SCE; Diffusion coefficient:  $7.01 \times 10^{-6} \text{ cm}^2/\text{s}$ , uncompensated resistance  $666 \Omega$ , capacitance  $1 \times 10^{-6}$  F. Experimental conditions: solvent: benzene: MeCN (v:v=1:1), supporting electrolyte: 0.1 M TBAPF<sub>6</sub>, Pt electrode area 0.027 cm<sup>2</sup>.

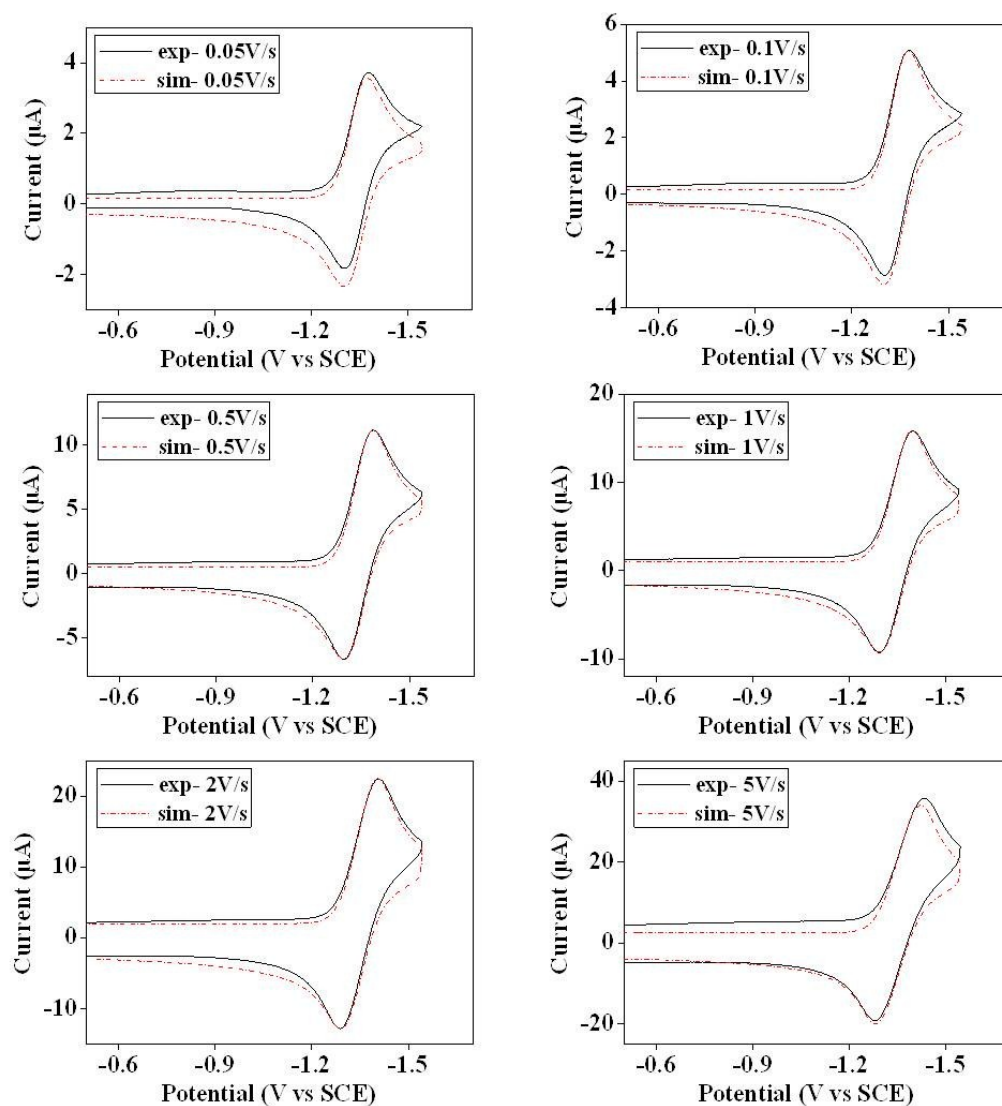

**Figure S-19.** Comparison between simulated and experimental reduction waves for 1.5 mM TPTZ-TAC3 at different scan rates. The model for these reduction simulations: EC, with  $n = 1$ , with a heterogeneous rate constant,  $\alpha = 0.5$ ,  $k^0 = 1 \times 10^4$  cm/s and a homogeneous forward rate constant,  $k_{\text{eq}} = 0.4$ ,  $k_f = 8$  s $^{-1}$ . Simulated data:  $E^0 = -1.35$  V vs SCE; Diffusion coefficient:  $7.00 \times 10^{-6}$  cm $^2$ /s, uncompensated resistance 883  $\Omega$ , capacitance  $3 \times 10^{-6}$  F. Experimental conditions: solvent: benzene: MeCN (v:v=1:1), supporting electrolyte: 0.1 M TBAPF $_6$ , Pt electrode area 0.027 cm $^2$ .



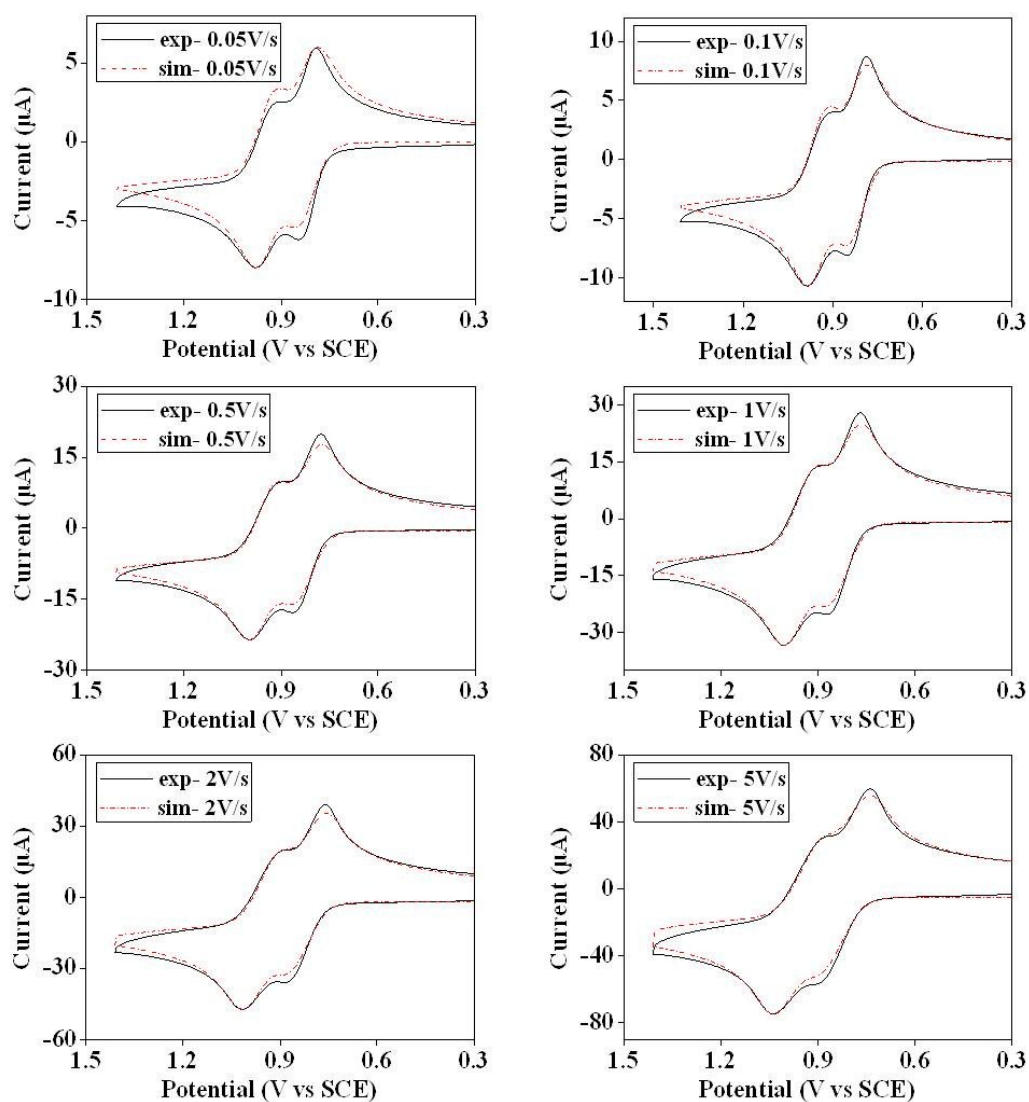

**Figure S-20.** Comparison between simulated and experimental oxidation waves for 1.5 mM TPTZ-TAC2 at different scan rates. The model for these oxidation simulations: ECE, with  $n = 2$ , with a heterogeneous rate constant,  $\alpha = 0.5$ ,  $k_1^0 = 0.1$  cm/s,  $k_2^0 = 0.1$  cm/s. Simulated data:  $E_1^0 = 0.82$  V vs SCE,  $E_2^0 = 0.95$  V vs SCE; Diffusion coefficient:  $7.01 \times 10^{-6}$  cm<sup>2</sup>/s, uncompensated resistance 1129  $\Omega$ , capacitance  $1 \times 10^{-6}$  F. Experimental conditions: solvent: benzene: MeCN ( $v:v=1:1$ ), supporting electrolyte: 0.1 M TBAPF<sub>6</sub>, Pt electrode area 0.027 cm<sup>2</sup>.

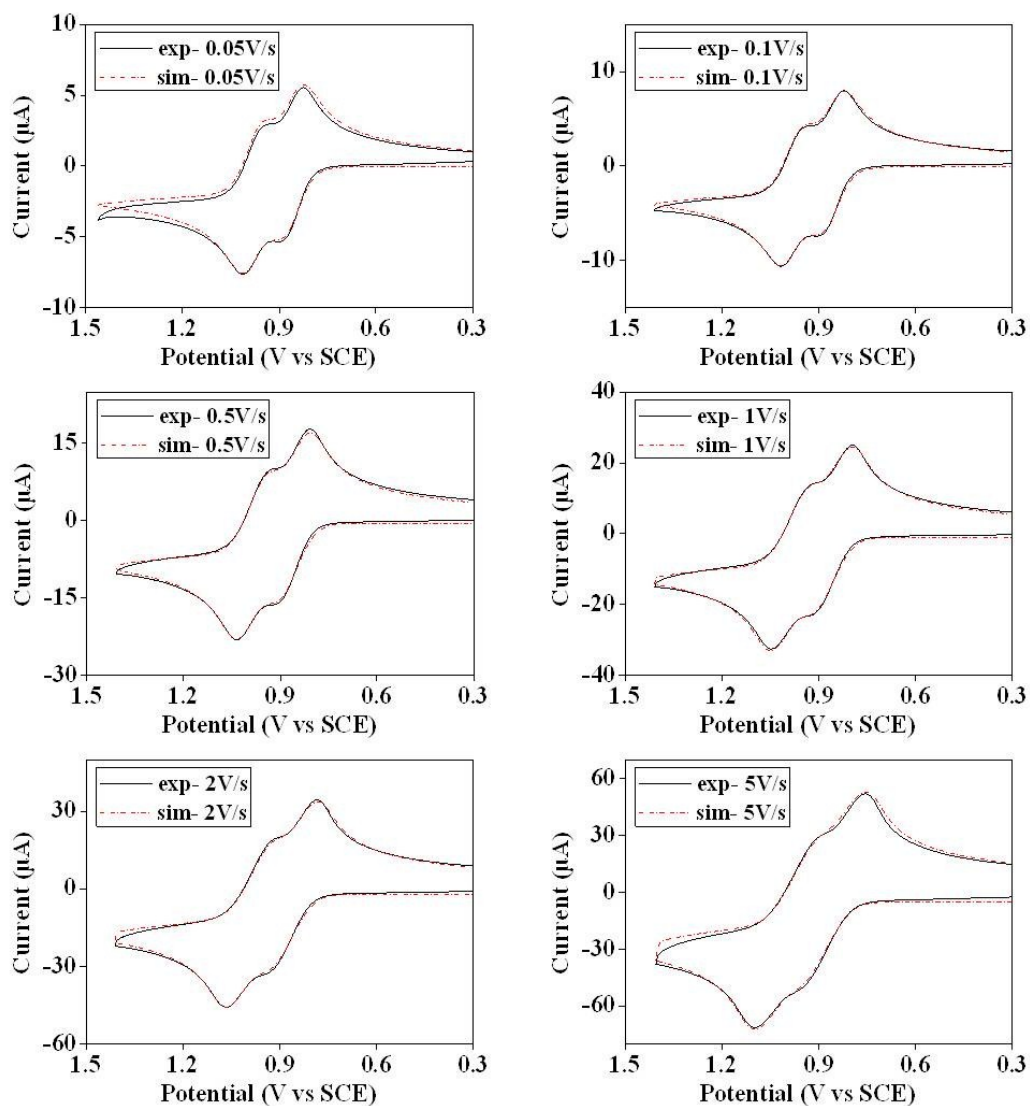

**Figure S-21.** Comparison between simulated and experimental oxidation waves for 1.5 mM TPTZ-TAC3 at different scan rates. The model for these oxidation simulations: ECE, with  $n = 2$ , with a heterogeneous rate constant,  $\alpha = 0.5$ ,  $k_1^0 = 0.1$  cm/s,  $k_2^0 = 0.1$  cm/s. Simulated data:  $E_1^0 = 0.86$  V vs SCE,  $E_2^0 = 0.97$  V vs SCE; Diffusion coefficient:  $7.00 \times 10^{-6}$  cm<sup>2</sup>/s, uncompensated resistance 1060  $\Omega$ , capacitance  $1 \times 10^{-6}$  F. Experimental conditions: solvent: benzene: MeCN ( $v:v=1:1$ ), supporting electrolyte: 0.1 M TBAPF<sub>6</sub>, Pt electrode area 0.027 cm<sup>2</sup>.

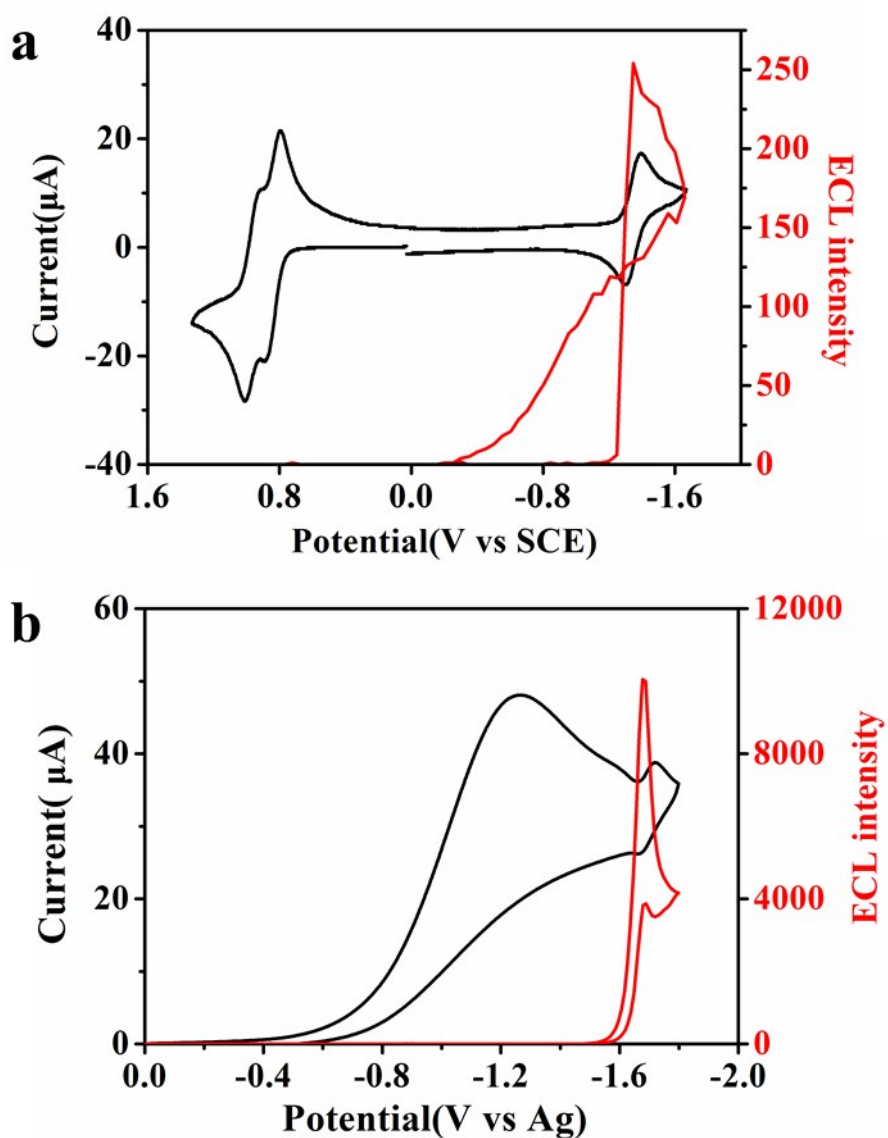

**Figure S-22.** ECL (red) and CV (black) simultaneous measurements for 1.5 mM TPTZ-TAC1 in the absence (a) and in the presence (b) of 10 mM benzoyl peroxide (BPO), Experimental conditions: solvent: benzene: MeCN ( $v:v=1:1$ ), supporting electrolyte: 0.1 M TBAPF<sub>6</sub>, negative high-voltage: 600 V, Pt electrode area 0.027 cm<sup>2</sup>.

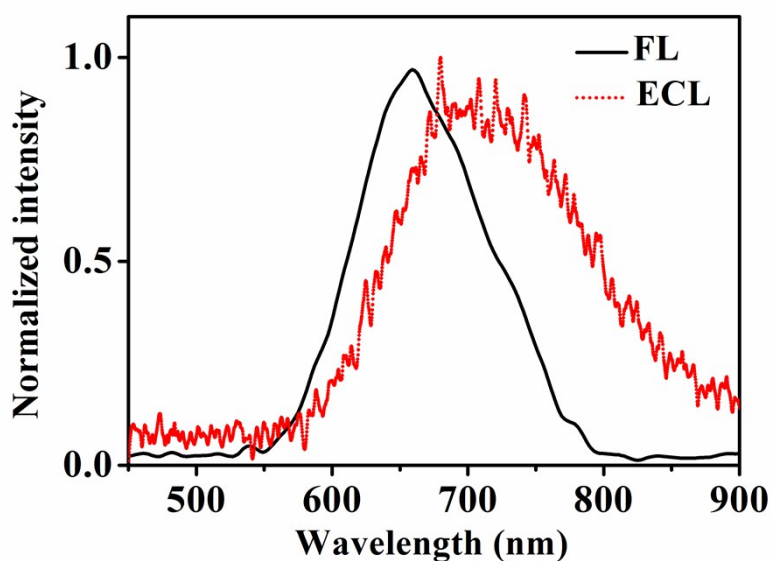

**Figure S-23.** Normalized fluorescence (solid, black) and ECL (short dot, red) spectra of TPTZ-TAC1 in benzene: MeCN ( $v:v=1:1$ ) solution; ECL conditions were same as Figure 5. The concentration of TPTC-TAC1 is  $1 \times 10^{-3}$  M for fluorescence and ECL spectrum. Slit width is 5 nm for fluorescence and 20 nm for ECL spectrum.

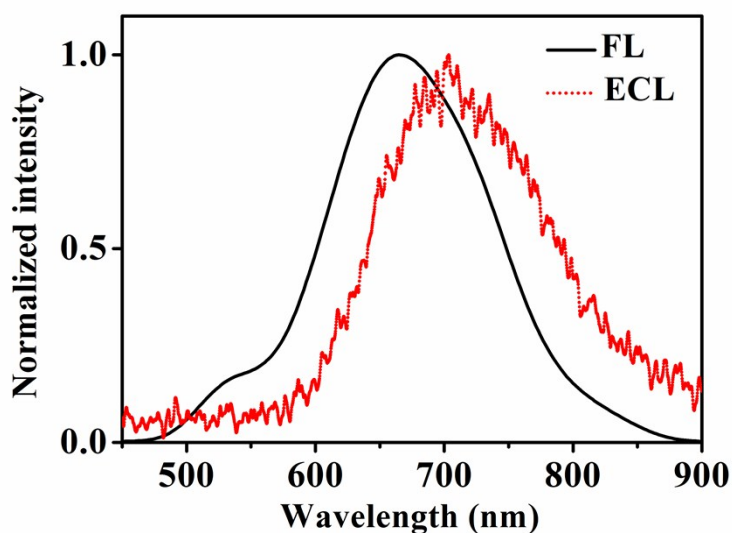

**Figure S-24.** Normalized fluorescence (solid, black) and ECL (short dot, red) spectra of TPTZ-TAC2 in benzene: MeCN ( $v:v=1:1$ ) solution; ECL conditions were same as Figure 5. The concentration of TPTC-TAC2 is  $1 \times 10^{-3}$  M for fluorescence and ECL spectrum.

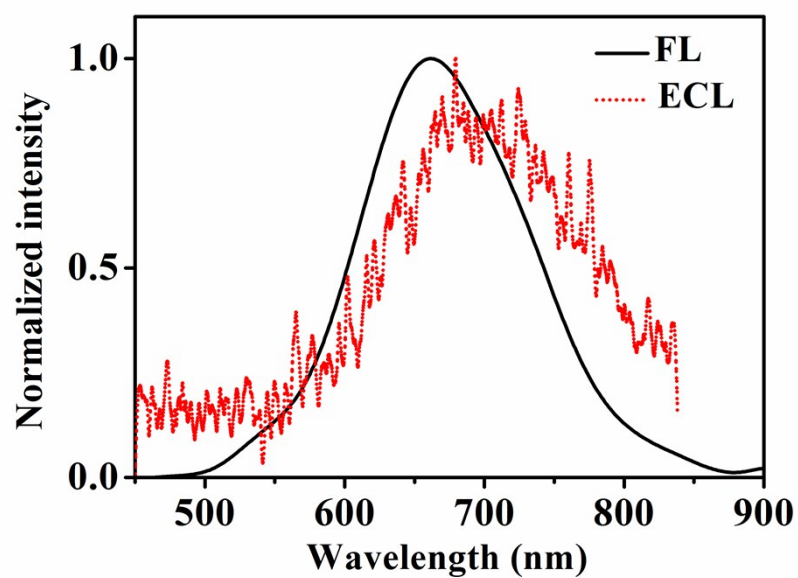

**Figure S-25.** Normalized fluorescence (solid, black) and ECL (short dot, red) spectra of TPTZ-TAC3 in benzene: MeCN ( $v:v=1:1$ ) solution; ECL conditions were same as Figure 5. The concentration of TPTC-TAC3 is  $1 \times 10^{-3}$  M for fluorescence and  $1 \times 10^{-3}$  M for ECL spectrum.
